# Supplementary material for: Eurasian snow depth in long-term climate reanalyses
Source: Copernicus journal article supplement (doi:10.5194/tc-11-923-2017), 2017-04-13
Supplement: Supplementary file 1 [file MW_supplement_Table1_RMSE_corr.xlsx]

## Sheet: Sheet1
corrrelation	st22550			st23405			st23711			st24641	st24641		st24966			st26063			st27199	st27199		st27675	st27675		st27955	st27995		st28275	st28275		st28440	st28440		st30758	st30758		st32098	st32098		st35108			st35121
																																															median
	Apr	Oct	Nov	Apr	Oct	Nov	Apr	Oct	Nov	Apr	Oct	Nov	Apr	Oct	Nov	Apr	Oct	Nov	Apr	Oct	Nov	Apr	Oct	Nov	Apr	Oct	Nov	Apr	Oct	Nov	Apr	Oct	Nov	Apr	Oct	Nov	Apr	Oct	Nov	Apr	Oct	Nov	Apr	Oct	Nov		Apr	Oct	Nov
ERA20C	0.71	0.48	0.69	0.56	0.75	0.77	0.81	0.73	0.73	0.66	0.67	0.66	0.5	0.68	0.69	0.46	0.56	0.66	0.63	0.62	0.68	0.69	0.51	0.67	0.59	0.51	0.67	0.6	0.64	0.63	0.68	0.57	0.71	0.21	0.47	0.55	oceangrid	oceangrid	oceangrid				0.38	0.5	0.6	ERA20C	0.6	0.57	0.67
20CRv2	0.73	0.58	0.73	0.53	0.76	0.68	0.75	0.8	0.72	0.52	0.8	0.74	0.48	0.75	0.7	0.64	0.6	0.73	0.67	0.68	0.69	0.65	0.64	0.71	0.59	0.69	0.62	0.63	0.71	0.66	0.66	0.67	0.71	0.21	0.46	0.52	oceangrid	oceangrid	oceangrid				0.43	0.45	0.65	20CRv2	0.63	0.68	0.7
20CRv2c	0.7	0.63	0.71	0.49	0.78	0.7	0.76	0.79	0.71	0.5	0.8	0.61	0.49	0.76	0.74	0.55	0.6	0.75	0.67	0.69	0.7	0.62	0.64	0.66	0.57	0.7	0.64	0.6	0.73	0.63	0.65	0.7	0.71	0.2	0.45	0.54	oceangrid	oceangrid	oceangrid				0.44	0.43	0.63	20CRv2c	0.57	0.7	0.7
ERA20C land	0.74	0.49	0.69	0.59	0.77	0.78	0.82	0.73	0.73	0.65	0.68	0.66	0.52	0.66	0.66	0.42	0.56	0.64	0.64	0.62	0.67	0.68	0.48	0.65	0.61	0.5	0.64	0.61	0.63	0.61	0.68	0.54	0.66	0.2	0.47	0.53	oceangrid	oceangrid	oceangrid				0.37	0.5	0.6	ERA20C land	0.61	0.56	0.66
ERAINT land d	0.84	0.72	0.82	0.82	0.89	0.92	0.93	0.86	0.85	0.84	0.9	0.83	0.73	0.88	0.84	0.32	0.86	0.72	0.85	0.83	0.9	0.83	0.77	0.74	0.91	0.6	0.88	0.88	0.89	0.8	0.73	0.83	0.87	0.46	0.45	0.79	oceangrid	oceangrid	oceangrid				0.67	0.68	0.76	ERAINT land d	0.83	0.83	0.83
ERAINT land e	0.85	0.71	0.82	0.8	0.89	0.92	0.95	0.87	0.84	0.77	0.89	0.81	0.72	0.87	0.82	0.48	0.86	0.74	0.9	0.83	0.88	0.79	0.78	0.74	0.85	0.62	0.86	0.84	0.87	0.75	0.75	0.81	0.83	0.36	0.42	0.69	oceangrid	oceangrid	oceangrid				0.67	0.66	0.73	ERAINT land e	0.79	0.83	0.82
mean	0.761667	0.601667	0.743333	0.631667	0.806667	0.795	0.836667	0.796667	0.763333	0.656667	0.79	0.718333	0.573333	0.766667	0.741667	0.478333	0.673333	0.706667	0.726667	0.711667	0.753333	0.71	0.636667	0.695	0.686667	0.603333	0.718333	0.693333	0.745	0.68	0.691667	0.686667	0.748333	0.273333	0.453333	0.603333	#DIV/0!	#DIV/0!	#DIV/0!				0.493333	0.536667	0.661667
	All correlations are significant on a 0,99 level
RMSE	st22550			st23405			st23711			st24641	st24641		st24966			st26063			st27199	st27199		st27675	st27675		st27955	st27995		st28275	st28275		st28440	st28440		st30758	st30758		st32098	st32098		st35108			st35121
																																															median
	Apr	Oct	Nov	Apr	Oct	Nov	Apr	Oct	Nov	Apr	Oct	Nov	Apr	Oct	Nov	Apr	Oct	Nov	Apr	Oct	Nov	Apr	Oct	Nov	Apr	Oct	Nov	Apr	Oct	Nov	Apr	Oct	Nov	Apr	Oct	Nov	Apr	Oct	Nov	Apr	Oct	Nov	Apr	Oct	Nov		Apr	Oct	Nov
ERA20C	22.35	5.08	8.93	24.04	6.4	11.7	18.1	5.5	11.44	12.4	4.56	6.58	18.01	7.82	9.7	13.01	1.57	4.64	22	3.35	7.85	11.6	1.94	5.58	8.98	1.38	3.88	17.96	4.25	9.43	14.87	4.11	7.25	6.33	3.17	5.68	oceangrid	oceangrid	oceangrid				15.17	1.51	5.44	ERA20C	15.17	4.11	7.25
20CRv2	21.27	3.86	9.03	37.97	6.43	18.9	32.15	5.62	15.48	24.89	6.3	16.91	31.78	10.64	22.45	12.57	1.91	6.32	22.41	2.8	8.16	18.17	1.33	5.54	9.2	1.36	4.53	23.45	3.92	12.63	24.19	3.74	10	14.47	3.12	14.39	oceangrid	oceangrid	oceangrid				12.32	1.17	4.39	20CRv2	22.41	3.74	10
20CRv2c	22.8	4.02	8.61	40.04	6.27	18.28	32.54	5.74	15.72	30.23	6.52	16.56	35.76	11.14	23.54	14.14	1.93	5.88	23.17	2.86	8.22	19.55	1.33	6.43	9.58	1.31	4.68	26.8	3.82	12.69	24.11	3.64	9.65	13.45	3.15	13.4	oceangrid	oceangrid	oceangrid				12.22	1.18	4.54	20CRv2c	23.17	3.64	9.65
ERA20C land	19.95	4.97	9.03	22.95	5.76	10.94	17.48	5.85	11.97	13.77	4.5	6.97	17.32	7.1	9.06	20.27	1.62	5.75	20.19	3.23	7.79	11.81	2.11	6.29	8.32	1.42	4.35	17.95	4.37	9.82	17.55	4.86	9.95	4.52	2.71	5.34	oceangrid	oceangrid	oceangrid				14.23	1.56	5.7	ERA20C land	17.48	4.37	7.79
ERAINT land d	19.58	3.99	6.97	17.87	3.43	7.95	19.71	3.37	12.52	12.63	2.97	5.04	16.64	3.55	6.96	5.94	0.84	3.91	18.5	1.85	4.67	7.53	0.65	4.29	5.7	0.82	2.99	12.23	1.83	7.36	12.44	1.94	4.9	33.25	1.53	11.88	oceangrid	oceangrid	oceangrid				12.58	0.52	3.61	ERAINT land d	12.63	1.85	5.04
ERAINT land e	10.51	4.1	5.86	27.44	2.96	4.15	14.04	2.58	7.1	12.91	3.06	4.56	15.74	3.93	5.48	2.75	0.88	3.33	9.33	1.94	4.09	5.64	0.64	3.54	6.67	0.79	2.25	7.67	1.57	4.62	7.41	1.76	4.63	20.65	1.31	9.67	oceangrid	oceangrid	oceangrid				6.71	0.54	2.85	ERAINT land e	9.33	1.76	4.56
mean	19.41	4.33667	8.07167	28.385	5.20833	11.9867	22.3367	4.77667	12.3717	17.805	4.65167	9.43667	22.5417	7.36333	12.865	11.4467	1.45833	4.97167	19.2667	2.67167	6.79667	12.3833	1.33333	5.27833	8.075	1.18	3.78	17.6767	3.29333	9.425	16.7617	3.34167	7.73	15.445	2.49833	10.06	#DIV/0!	#DIV/0!	#DIV/0!				12.205	1.08	4.42167
	All values shown are for the longest timeperiod available,
[truncated: 6 more columns]
