# Supplementary material for: Eurasian snow depth in long-term climate reanalyses
Source: Copernicus journal article supplement (doi:10.5194/tc-11-923-2017), 2017-04-13
Supplement: Supplementary file 1 [file tc-11-923-2017-supplement.zip]

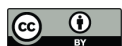

## *Supplement of*

# **Eurasian snow depth in long-term climate reanalyses**

**Martin Wegmann et al.**

*Correspondence to:* Martin Wegmann ([martin.wegmann@univ-grenoble-alpes.fr](mailto:martin.wegmann@univ-grenoble-alpes.fr))

- [tc-11-923-2017-supplement-title-page.pdf](#)
- [MW\\_supplement\\_Table1\\_RMSE\\_corr.xlsx](#)
- [MW\\_supplementary\\_material.docx](#)

The copyright of individual parts of the supplement might differ from the CC-BY 3.0 licence.
